# Supplementary material for: The effectiveness of group-based pelvic floor muscle training in preventing and treating urinary incontinence for antenatal and postnatal women: a systematic review
Source: Springer Nature journal article supplement (doi:10.1007/s00192-021-04960-2), 2021-08-28
Supplement: MOESM2 [file 19607788]

## Group-based PFMT compared to usual care for preventing or treating UI in pregnant or postpartum women

Bibliography: . PFMT for UI in pregnant or postpartum women. Cochrane Database of Systematic Reviews [Year], Issue [Issue].

| Certainty assessment             |              |               |              |             |                  |                               | Summary of findings   |                       |                          |                              |                                       |
|----------------------------------|--------------|---------------|--------------|-------------|------------------|-------------------------------|-----------------------|-----------------------|--------------------------|------------------------------|---------------------------------------|
| Participants (studies) Follow up | Risk of bias | Inconsistency | Indirectness | Imprecision | Publication bias | Overall certainty of evidence | Study event rates (%) |                       | Relative effect (95% CI) | Anticipated absolute effects |                                       |
|                                  |              |               |              |             |                  |                               | With usual care       | With group-based PFMT |                          | Risk with usual care         | Risk difference with group-based PFMT |

### self-reported UI (follow up: range 36 weeks to 6 months; assessed with: participant numbers)

|                  |                      |             |             |                      |      |             |                    |                    |                                  |               |                                                            |
|------------------|----------------------|-------------|-------------|----------------------|------|-------------|--------------------|--------------------|----------------------------------|---------------|------------------------------------------------------------|
| 1569<br>(4 RCTs) | serious <sup>a</sup> | not serious | not serious | serious <sup>b</sup> | none | ⊕⊕○○<br>LOW | 343/812<br>(42.2%) | 210/757<br>(27.7%) | <b>RR 0.67</b><br>(0.58 to 0.77) | 422 per 1,000 | <b>139 fewer per 1,000</b><br>(from 177 fewer to 97 fewer) |
|------------------|----------------------|-------------|-------------|----------------------|------|-------------|--------------------|--------------------|----------------------------------|---------------|------------------------------------------------------------|

### self-reported UI during pregnancy period (follow up: range 36 weeks to 38 weeks; assessed with: participant numbers)

|                 |                      |             |             |                      |      |             |                    |                    |                                  |               |                                                             |
|-----------------|----------------------|-------------|-------------|----------------------|------|-------------|--------------------|--------------------|----------------------------------|---------------|-------------------------------------------------------------|
| 820<br>(4 RCTs) | serious <sup>a</sup> | not serious | not serious | serious <sup>b</sup> | none | ⊕⊕○○<br>LOW | 219/429<br>(51.0%) | 133/391<br>(34.0%) | <b>RR 0.67</b><br>(0.57 to 0.80) | 510 per 1,000 | <b>168 fewer per 1,000</b><br>(from 220 fewer to 102 fewer) |
|-----------------|----------------------|-------------|-------------|----------------------|------|-------------|--------------------|--------------------|----------------------------------|---------------|-------------------------------------------------------------|

### self-reported UI during the postpartum period (follow up: range 3 months to 6 months; assessed with: participant numbers)

|                 |                      |             |             |                      |      |             |                    |                |                                  |               |                                                            |
|-----------------|----------------------|-------------|-------------|----------------------|------|-------------|--------------------|----------------|----------------------------------|---------------|------------------------------------------------------------|
| 749<br>(3 RCTs) | serious <sup>a</sup> | not serious | not serious | serious <sup>b</sup> | none | ⊕⊕○○<br>LOW | 124/383<br>(32.4%) | 77/366 (21.0%) | <b>RR 0.66</b><br>(0.52 to 0.84) | 324 per 1,000 | <b>110 fewer per 1,000</b><br>(from 155 fewer to 52 fewer) |
|-----------------|----------------------|-------------|-------------|----------------------|------|-------------|--------------------|----------------|----------------------------------|---------------|------------------------------------------------------------|

CI: Confidence interval; RR: Risk ratio

#### Explanations

- a. Unclear allocation concealment and blinding of outcome assessors
- b. Insufficient sample size
